# Supplementary material
Source: publisher figshare collection journal article supplement (https://acs.figshare.com/ndownloader/files/24987367)
Supplement: Supplementary file 1 [file 24987367]

## **Supporting Information**

### **Functionalized Vascular Structure in Bioengineered Liver Identified with Proteomics**

Guo Beibei<sup>1</sup>†, Zhou Qian<sup>1</sup>†, Jiang Jing<sup>1, 2</sup>†, Chen Jiaxian<sup>1</sup>, Liang Xi<sup>2</sup>, Xin Jiaojiao<sup>1, 2</sup>, Shi Dongyan<sup>1, 2</sup>, Ren Keke<sup>1</sup>, Zhou Xingping<sup>1</sup>, Hozeifa. M. Hassan<sup>1</sup>, Li Jun<sup>1, 2\*</sup>.

†: These authors contributed equally to this work.

\*: corresponding author Jun Li. Ph.D. & M.D. Professor

E-mail: lijun2009@zju.edu.cn

Total pages: 5, Figure numbers: 2, Table numbers: 4

**Contents:**

1. Figure S1. Negative control of immunofluorescence staining of the decellularized liver scaffolds.
2. Figure S2. Functional enrichment analysis of the coexpressed proteins identified in the vascularized liver scaffolds at days 14 and 21.
3. Table S1. List of antibodies.
4. Table S2. List of proteins identified in decellularized liver scaffolds.
5. Table S3. List of all proteins identified in the vascularized liver scaffolds at different time points.
6. Table S4. Gene Ontology biological process terms at different time points.

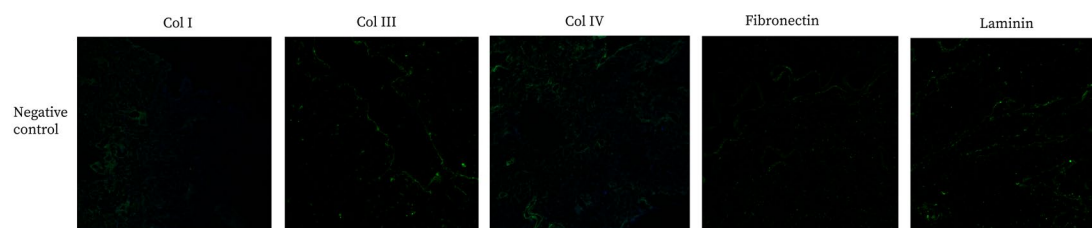

**Figure S1.** Negative control of immunofluorescence staining of collagens, fibronectin and laminin in the decellularized liver scaffolds. The results showed non-specific fluorescence of the collagen and matrix staining in negative control. And the fluorescence intensity was obviously lower than that of native livers and decellularized liver scaffolds.

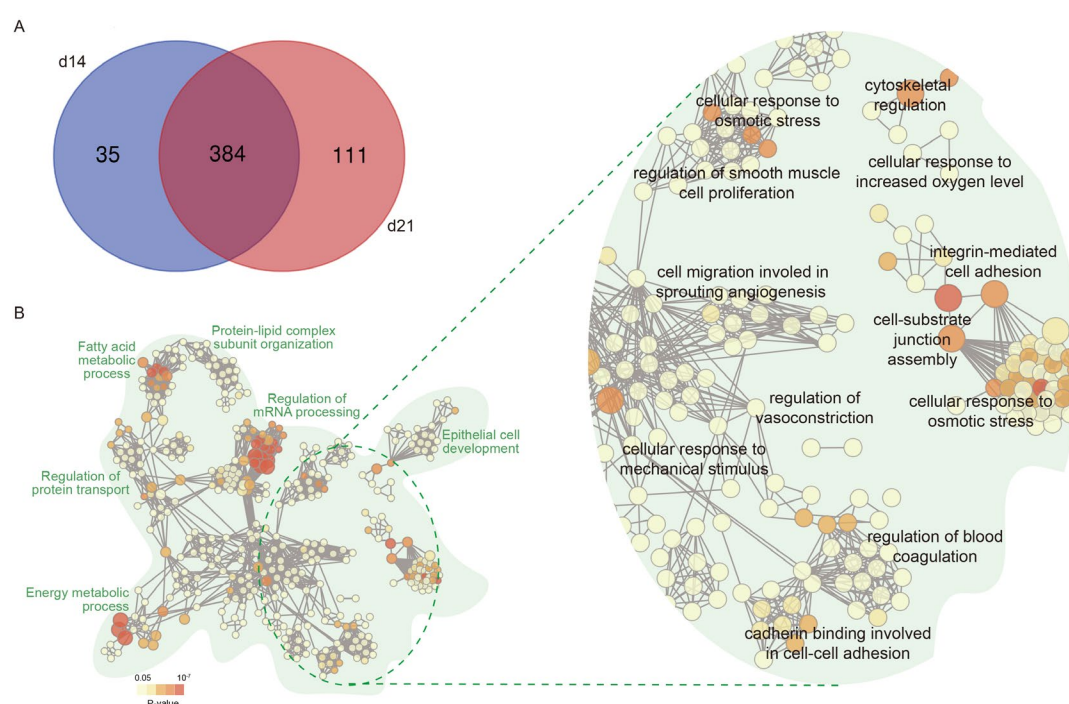

**Figure S2.** Functional enrichment analysis of the vascularized liver scaffolds at days 14 and 21. (A) Venn diagram summarizing 384 human-derived proteins coexpressed at days 14 and 21. (B) Functional enrichment analysis diagram of the main biological processes related to vascularization.

**Table S1. List of antibodies.**

| Antibodies          | Company                        | Cat. No.  | Species Specific test |
|---------------------|--------------------------------|-----------|-----------------------|
| anti-collagen I     | Abcam, Cambridge, UK           | #ab84956  | Rat                   |
| anti-collagen III   | Abcam, Cambridge, UK           | #ab7778   | Rat and Human         |
| anti-collagen IV    | Abcam, Cambridge, UK           | #ab19808  | Rat                   |
| anti-fibronectin    | Abcam, Cambridge, UK           | #ab199056 | Rat                   |
| anti-laminin        | Abcam, Cambridge, UK           | #ab11575  | Rat and Human         |
| anti- vWF           | Abcam, Cambridge, UK           | #ab9378   | Human                 |
| anti-VEGF2          | Abcam, Cambridge, UK           | #ab2349   | Human                 |
| anti-Ki67           | Abcam, Cambridge, UK           | #ab245113 | Human                 |
| anti-VE Cadherin    | Abcam, Cambridge, UK           | #ab232880 | Human                 |
| anti-ICAM1          | Abcam, Cambridge, UK           | #ab53013  | Human                 |
| anti-MYPC1          | Abcam, Cambridge, UK           | #ab113814 | Human                 |
| anti-MYH4           | Abcam, Cambridge, UK           | #ab111442 | Human                 |
| anti- $\alpha$ -SMA | Invitrogen Corp., Carlsbad, CA | #PA532587 | Human                 |
| anti-TGM2           | Abcam, Cambridge, UK           | #ab137378 | Human                 |

## **Supporting Information Table legends**

**Table S1.** List of antibodies.

vWF: von Willebrand Factor, VEGFR2: vascular endothelial growth factor receptor 2, VE-cadherin: vascular endothelial-cadherin, ICAM-1: intercellular adhesion molecule 1, MYPC1: myosin-binding protein C,  $\alpha$ -SMA: alpha-smooth muscle actin, TGM2: transglutaminase 2.

**Table S2.** List of proteins identified in decellularized liver scaffolds. Identifications were based on a 1% false discovery rate at both the peptide and the protein level.

**Table S3.** All proteins identified in the vascularized liver scaffolds at different time points. Identifications were based on a 1% false discovery rate at both the peptide and the protein level.

**Table S4.** Gene Ontology biological process terms at different time points.  $P < 0.01$  were set to filter Gene Ontology terms. Protein number is the count of proteins that was clustered in a certain Gene Ontology term. Protein IDs showed the proteins that were clustered into each Gene Ontology term.
